# Supplementary material for: Large-Scale Modelling of the Environmentally-Driven Population Dynamics of Temperate Aedes albopictus (Skuse)
Source: PubMed Central journal article supplement (PMC4752251; doi:10.1371/journal.pone.0149282), 2016-02-12
Supplement: pone.0149282.s004.pdf [file pone.0149282.s004.pdf]

**Table S.1. Model parameters with functional forms of environmental dependence and prior distributions.** Median, blue line, and 95% confidence range, blue shade, of prior distributions are also plotted to aid in visualisation.

| Model Parameters | Description                                                                         | Prior Distribution   | References |
|------------------|-------------------------------------------------------------------------------------|----------------------|------------|
| $Egg_0$          | Initial number of non-diapausing eggs per ovitrap                                   | 0 (fixed)            |            |
| $Egg_0^*$        | Initial number of tagged eggs per ovitrap                                           | 0 (fixed)            |            |
| $Egg_0^0$        | Initial number of diapausing eggs per ovitrap                                       | Uniform(0, $10^6$ )  |            |
| $Larva_0$        | Initial number of larvae per ovitrap                                                | 0 (fixed)            |            |
| $Pupa_0$         | Initial number of pupae per ovitrap                                                 | 0 (fixed)            |            |
| $Naive_0$        | Initial number of naive females per ovitrap                                         | 0 (fixed)            |            |
| $Adult_0$        | Initial number of adult females per ovitrap                                         | 0 (fixed)            |            |
| $\alpha_{pdens}$ | Increase in carrying capacity per unit human population density per ovitrap per day | Uniform(0, 1)        |            |
| $\alpha_{dprec}$ | Increase in carrying capacity per unit precipitation per ovitrap per day            | Uniform(0, 1)        |            |
| $\alpha_{evap}$  | Fraction of carrying capacity retained daily                                        | Uniform(0, 1)        |            |
| CPP              | Critical photoperiod (photoperiod: fraction of the day with daylight)               | Uniform(0, 1)        |            |
| $T_{crt}$        | Critical air temperature for laying diapausing eggs                                 | $\mathcal{N}(21, 3)$ | [1, 2]     |
| $p_s$            | Fraction of eggs tagged for diapause each day                                       | Uniform(0, 1)        |            |
| $p_n$            | Fraction of diapausing eggs exiting diapause each day                               | Uniform(0, 1)        |            |
| $\Delta_T$       | $T_w - T_a$ : The difference between water and air temperature                      | $\mathcal{N}(0, 3)$  |            |

Table S.1 – continued from previous page

| Model Parameters                                      | Description                                                                                                                                                                                                  | Prior Distribution | References                                                                                                                                                                                                                                                                          |
|-------------------------------------------------------|--------------------------------------------------------------------------------------------------------------------------------------------------------------------------------------------------------------|--------------------|-------------------------------------------------------------------------------------------------------------------------------------------------------------------------------------------------------------------------------------------------------------------------------------|
| $\alpha_{d1.1}$<br>$\alpha_{d1.2}$<br>$\alpha_{d1.3}$ | <p>Average development time for eggs</p> <p><b>Functional form:</b><br/> <math>d_1(T_w) = \alpha_{d1.1} + \alpha_{d1.2} T_w + \alpha_{d1.3} T_w^2</math></p> <p><b>Range:</b> <math>[0, \infty)</math></p>   |                    | <p>1: [4]<br/>                 2: [41]<br/>                 3: [27]<br/>                 4: [28]</p>                                                                                                                                                                                |
| $\alpha_{d2.1}$<br>$\alpha_{d2.2}$<br>$\alpha_{d2.3}$ | <p>Average development time for larvae</p> <p><b>Functional form:</b><br/> <math>d_2(T_w) = \alpha_{d2.1} + \alpha_{d2.2} T_w + \alpha_{d2.3} T_w^2</math></p> <p><b>Range:</b> <math>[0, \infty)</math></p> |                    | <p>1: [4]<br/>                 2: [18]<br/>                 3: [16]<br/>                 4: [42]<br/>                 5: [19]<br/>                 6: [41]<br/>                 7: [27]<br/>                 8: [43]<br/>                 9: [44]<br/>                 10: [45]</p> |
| $\alpha_{d3.1}$<br>$\alpha_{d3.2}$<br>$\alpha_{d3.3}$ | <p>Average development time for pupae</p> <p><b>Functional form:</b><br/> <math>d_3(T_w) = \alpha_{d3.1} + \alpha_{d3.2} T_w + \alpha_{d3.3} T_w^2</math></p> <p><b>Range:</b> <math>[0, \infty)</math></p>  |                    | <p>1: [4]<br/>                 2: [42]<br/>                 3: [41]<br/>                 4: [27]<br/>                 5: [44]</p>                                                                                                                                                   |

Table S.1 – continued from previous page

| Model Parameters                                      | Description                                                                                                                                                                                                                           | Prior Distribution | References                                                                                                                                                                                                                                                                                                                                                                                                                                                             |
|-------------------------------------------------------|---------------------------------------------------------------------------------------------------------------------------------------------------------------------------------------------------------------------------------------|--------------------|------------------------------------------------------------------------------------------------------------------------------------------------------------------------------------------------------------------------------------------------------------------------------------------------------------------------------------------------------------------------------------------------------------------------------------------------------------------------|
| $\alpha_{bm.1}$<br>$\alpha_{bm.2}$<br>$\alpha_{bm.3}$ | <p>Time from becoming an adult to obtaining first blood-meal</p> <p><b>Functional form:</b><br/> <math>t_{bm}(T_a) = \alpha_{bm.1} + \alpha_{bm.2} T_a + \alpha_{bm.3} T_a^2</math></p> <p><b>Range:</b> <math>[0, \infty)</math></p> |                    | <p>1: [4]<br/>                 2: [6]</p>                                                                                                                                                                                                                                                                                                                                                                                                                              |
| $\alpha_{F4.1}$<br>$\alpha_{F4.2}$<br>$\alpha_{F4.3}$ | <p>Number of eggs laid per female adult mosquito per day</p> <p><b>Functional form:</b><br/> <math>F_4(T_a) = \alpha_{F4.1} + \alpha_{F4.2} T_a + \alpha_{F4.3} T_a^2</math></p> <p><b>Range:</b> <math>[0, \infty)</math></p>        |                    | <p>1: [11]<br/>                 2: [22]<br/>                 3: [4]<br/>                 4: [29]<br/>                 5: [26]<br/>                 6: [27]<br/>                 7: [30]<br/>                 8: [31]<br/>                 9: [32]<br/>                 10: [12]<br/>                 11: [33]<br/>                 12: [24]<br/>                 13: [34]<br/>                 14: [23]<br/>                 15: [6]<br/>                 16: [10]</p> |

Table S.1 – continued from previous page

| Model Parameters                                      | Description                                                                                                                                                                                                                            | Prior Distribution                                                                  | References                                                                                                       |
|-------------------------------------------------------|----------------------------------------------------------------------------------------------------------------------------------------------------------------------------------------------------------------------------------------|-------------------------------------------------------------------------------------|------------------------------------------------------------------------------------------------------------------|
| $\alpha_{p0.1}$<br>$\alpha_{p0.2}$                    | <p>Daily survival probability of diapausing eggs</p> <p><b>Functional form:</b><br/> <math>p_0(T_a) = \alpha_{p0.1} + \alpha_{p0.2} T_a</math></p> <p><b>Range:</b> [0, 1]</p>                                                         | 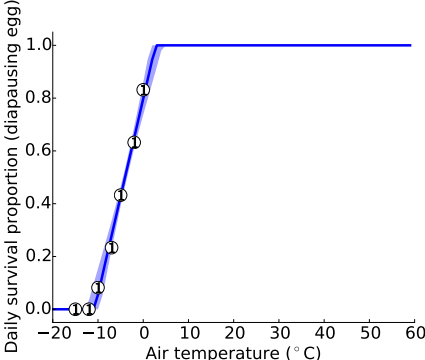  | 1: [3]                                                                                                           |
| $\alpha_{p1.1}$<br>$\alpha_{p1.2}$<br>$\alpha_{p1.3}$ | <p>Daily survival probability of non-diapausing eggs</p> <p><b>Functional form:</b><br/> <math>p_1(T_w) = \alpha_{p1.1} \frac{1}{1+e^{(\alpha_{p1.2}-T_w)}} \frac{1}{1+e^{(T_w-\alpha_{p1.3})}}</math></p> <p><b>Range:</b> [0, 1]</p> |  | 1: [4]<br>2: [5]<br>3: [6]<br>4: [7]<br>5: [8]<br>6: [9]<br>7: [10]<br>8: [11]<br>9: [12]<br>10: [13]<br>11: [3] |

Table S.1 – continued from previous page

| Model Parameters                                      | Description                                                                                                                                                                                               | Prior Distribution | References                                                                                                                                                                                                                                                                                                                                     |
|-------------------------------------------------------|-----------------------------------------------------------------------------------------------------------------------------------------------------------------------------------------------------------|--------------------|------------------------------------------------------------------------------------------------------------------------------------------------------------------------------------------------------------------------------------------------------------------------------------------------------------------------------------------------|
| $\alpha_{p2.1}$<br>$\alpha_{p2.2}$<br>$\alpha_{p2.3}$ | <p>Daily survival probability of larvae</p> <p><b>Functional form:</b></p> $p_2(T_w) = \alpha_{p2.1} \frac{1}{1+e^{(\alpha_{p2.2}-T_w)}} \frac{1}{1+e^{(T_w-\alpha_{p2.3})}}$ <p><b>Range:</b> [0, 1]</p> |                    | <p>1: [14]<br/>                 2: [4]<br/>                 3: [15]<br/>                 4: [16]<br/>                 5: [17]<br/>                 6: [10]<br/>                 7: [18]<br/>                 8: [19]<br/>                 9: [12]</p>                                                                                          |
| $\alpha_{p3.1}$<br>$\alpha_{p3.2}$<br>$\alpha_{p3.3}$ | <p>Daily survival probability of pupae</p> <p><b>Functional form:</b></p> $p_3(T_w) = \alpha_{p3.1} \frac{1}{1+e^{(\alpha_{p3.2}-T_w)}} \frac{1}{1+e^{(T_w-\alpha_{p3.3})}}$ <p><b>Range:</b> [0, 1]</p>  |                    | <p>1: [4]<br/>                 2: [17]<br/>                 3: [10]<br/>                 4: [12]</p>                                                                                                                                                                                                                                           |
| $\alpha_{p4.1}$<br>$\alpha_{p4.2}$<br>$\alpha_{p4.3}$ | <p>Daily survival probability of adults</p> <p><b>Functional form:</b></p> $p_4(T_a) = \alpha_{p4.1} \frac{1}{1+e^{(\alpha_{p4.2}-T_a)}} \frac{1}{1+e^{(T_a-\alpha_{p4.3})}}$ <p><b>Range:</b> [0, 1]</p> |                    | <p>1: [20]<br/>                 2: [21]<br/>                 3: [22]<br/>                 4: [4]<br/>                 5: [23]<br/>                 6: [24]<br/>                 7: [25]<br/>                 8: [15]<br/>                 9: [26]<br/>                 10: [27]<br/>                 11: [6]<br/>                 12: [28]</p> |

Table S.1 – continued from previous page

| Model Parameters                                                                                 | Description                                                                                                                                                                                                                                                                                                                                                                                                                         | Prior Distribution                                                                                                                                                                                                                               | References         |
|--------------------------------------------------------------------------------------------------|-------------------------------------------------------------------------------------------------------------------------------------------------------------------------------------------------------------------------------------------------------------------------------------------------------------------------------------------------------------------------------------------------------------------------------------|--------------------------------------------------------------------------------------------------------------------------------------------------------------------------------------------------------------------------------------------------|--------------------|
| $kd_{23}$                                                                                        | <p>Density-dependent reduction in the daily survival probabilities of larvae and pupae</p> <p><b>Functional form:</b><br/> <math>\mu_t = (\text{Larva}_t + \text{Pupa}_t) / \mathcal{K}_t</math><br/> <math>p_{LD}(\mu_t) = e^{-kd_{23} \mu_t}</math></p> <p><b>Range:</b> <math>[0, 1]</math></p>                                                                                                                                  | 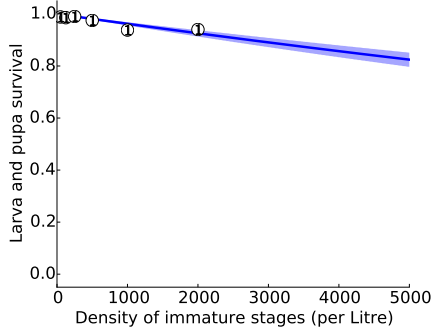                                                                                                                                                               | 1: [40]            |
| $\alpha_{n23.1}$<br>$\alpha_{n23.2}$<br>$\alpha_{n23.3}$<br>$\alpha_{n23.4}$<br>$\alpha_{n23.5}$ | <p>Density- and temperature-dependent increase in development times of larvae and pupae</p> <p><b>Functional form:</b><br/> <math>\mu_t = (\text{Larva}_t + \text{Pupa}_t) / \mathcal{K}_t</math><br/> <math>\tau(T_w) = \alpha_{n23.3} + \alpha_{n23.4} T_w + \alpha_{n23.5} T_w^2</math><br/> <math>d_{23}(\mu_t, T_w) = \alpha_{n23.1} \mu_t^{\alpha_{n23.2}} \tau(T_w)</math></p> <p><b>Range:</b> <math>[1, \infty]</math></p> | <p><math>d_{23}(\mu_t, T_w)</math></p> <br><p><math>\tau(T_w)</math></p>  | 1: [40]<br>2: [22] |

## References

1. Pumpuni C, Knepler J, Jr GC. Influence of temperature and larval nutrition on the diapause inducing photoperiod of *Aedes albopictus*. *Journal of the American Mosquito Control Association*. 1992;8(3):223–227.
2. Lacour G, Vernichon F, Cadilhac N, Boyer S, Lagneau C, Hance T. When mothers anticipate: effects of the pre-diapause stage on embryo development time and of maternal photoperiod on eggs of a temperate and a tropical strains of *Aedes albopictus* (Diptera: Culicidae). *JOURNAL OF INSECT PHYSIOLOGY*. 2014 Dec;71:87–96.
3. Thomas SM, Obermayr U, Fischer D, Kreyling J, Beierkuhnlein C. Low-temperature threshold for egg survival of a post-diapause and non-diapause European aedine strain, *Aedes albopictus* (Diptera: Culicidae). *Parasit Vectors*. 2012 Jan;5:100.
4. Delatte H, Gimonneau G, Triboire A, Fontenille D. Influence of Temperature on Immature Development, Survival, Longevity, Fecundity, and Gonotrophic Cycles of *Aedes albopictus*, Vector of Chikungunya and Dengue in the Indian Ocean. *Journal of Medical Entomology*. 2009;46(1):33–41.
5. Calado DC, Silva MAN. Avaliação da influência da temperatura sobre o desenvolvimento de *Aedes albopictus*. *Rev Saúde Pública*. 2002;36(2):173–179.
6. Calado DC, Navarro-Silva MA. Influência da temperatura sobre a longevidade, fecundidade e atividade hematofágica de *Aedes (Stegomyia) albopictus* Skuse, 1894 (Diptera, Culicidae) sob condições de laboratório. *Rev Bras Entomol*. 2002;46:93–98.
7. Juliano S, O'Meara G, Morrill J, Cutwa M. Desiccation and thermal tolerance of eggs and the coexistence of competing mosquitoes. *Oecologia*. 2002;130(3):458–469.
8. Sota T, Mogi M. Interspecific variation in desiccation survival time of *Aedes (Stegomyia)* mosquito eggs is correlated with habitat and egg size. *Oecologia*. 1992;90(3):353–358.
9. Gubler DJ. Comparison of reproductive potentials of *Aedes (Stegomyia) albopictus* Skuse and *Aedes (Stegomyia) polynesiensis* Marks. *Mosquito News*. 1970;30(2):201–209 .
10. Islam MS, Dobson SL. Wolbachia Effects on *Aedes albopictus* (Diptera: Culicidae) Immature Survivorship and Development. *Journal of Medical Entomology*. 2006;43(4):689–695.
11. Bellini R, Medici A, Calzolari M, Bonilauri P, Cavrini F, Sambri V, et al. Impact of Chikungunya Virus on *Aedes albopictus* Females and Possibility of Vertical Transmission Using the Actors of the 2007 Outbreak in Italy. *PLoS ONE*. 2012;7(2):e28360.
12. Aida HN, Dieng H, Ahmad AH, Satho T, Nurita AT, Salmah MRC, et al. The biology and demographic parameters of *Aedes albopictus* in northern peninsular Malaysia. *Asian Pacific Journal of Tropical Biomedicine*. 2011;1(6):472–477.
13. Lounibos LP, O'Meara GF, Juliano SA, Nishimura N, Escher RL, Reiskind MH, et al. Differential Survivorship of Invasive Mosquito Species in South Florida Cemeteries: Do Site-Specific Microclimates Explain Patterns of Coexistence and Exclusion? *Annals of the Entomological Society of America*. 2010;103(5):757–770.
14. Chang LH, Hsu EL, Teng HJ, Ho CM. Differential Survival of *Aedes aegypti* and *Aedes albopictus* (Diptera: Culicidae) Larvae Exposed to Low Temperatures in Taiwan. *Journal of Medical Entomology*. 2007;44(2):205–210.
15. O'Donnell D, Armbruster P. Inbreeding depression affects life-history traits but not infection by *Plasmodium gallinaceum* in the Asian tiger mosquito, *Aedes albopictus*. *Infection, Genetics and Evolution*. 2010;10(5):669–677.
16. Dieng H, Boots M, Mwandawiro C, Satho T, Hasegawa M, Nyambura GJ, et al. Effects of a copepod predator on the survivorship and development of *Aedes albopictus* (Diptera: Culicidae). *The Japan Society of Medical Entomology and Zoology*. 2003;54(2):187–192.
17. Monteiro LCC, De Souza JRB, De Albuquerque CMR. Eclosion rate, development and survivorship of *Aedes albopictus* (Skuse)(Diptera: Culicidae) under different water temperatures. *Neotropical Entomology*. 2007;36(6):966–971.
18. Dieng H, Mwandawiro C, Boots M, Morales R, Satho T, Tuno N, et al. Leaf litter decay process and the growth performance of *Aedes albopictus* larvae (Diptera: Culicidae). *Journal of vector ecology*. 2002;27:31–38.

19. Medici A, Carrieri M, Scholte EJ, Maccagnani B, Dindo ML, Bellini R. Studies on *Aedes albopictus* Larval Mass-Rearing Optimization. *Journal of Economic Entomology*. 2011;104(1):266–273.
20. Alto BW, Juliano SA. Temperature effects on the dynamics of *Aedes albopictus* (Diptera: Culicidae) populations in the laboratory. *Journal of medical entomology*. 2001;38(4):548.
21. Alto BW, Juliano SA. Precipitation and temperature effects on populations of *Aedes albopictus* (Diptera: Culicidae): implications for range expansion. *Journal of medical entomology*. 2001;38(5):646.
22. Briegel H, Timmermann SE. *Aedes albopictus* (Diptera: Culicidae): Physiological Aspects of Development and Reproduction. *Journal of Medical Entomology*. 2001;38(4):566–571.
23. Braks MAH, Juliano SA, Lounibos LP. Superior reproductive success on human blood without sugar is not limited to highly anthropophilic mosquito species. *Medical and veterinary entomology*. 2006;20(1):53–59.
24. Löwenberg Neto P, Navarro-Silva MA. Development, longevity, gonotrophic cycle and oviposition of *Aedes albopictus* Skuse (Diptera: Culicidae) under cyclic temperatures. *Neotropical Entomology*. 2004;33(1):29–33.
25. Muturi EJ, Lampman R, Costanzo K, Alto BW. Effect of Temperature and Insecticide Stress on Life-History Traits of *Culex restuans* and *Aedes albopictus* (Diptera: Culicidae). *Journal of Medical Entomology*. 2011;48(2):243–250.
26. Tsuda Y, Takagi M, Suzuki A, Wada Y. A comparative study on life table characteristics of two strains of *Aedes albopictus* from Japan and Thailand. *Tropical Medicine*. 1994;36(1).
27. Udaka M. Some ecological notes on *Aedes albopictus* Skuse in Shikoku, Japan. *Japanese journal of entomology*. 1959;27(3):202–208.
28. Hien DS. Biology of *Aedes aegypti* (L. 1762) and *Aedes albopictus* (Skuse, 1895) (Diptera, Culicidae). II. Effect of certain environmental conditions on the hatching of larvae. *Acta Parasitol Pol*. 1975;23:537–552.
29. Dieng H, Saifur RGM, Hassan AA, Salmah MRC, Boots M, Satho T, et al. Indoor-Breeding of *Aedes albopictus* in Northern Peninsular Malaysia and Its Potential Epidemiological Implications. *PLoS ONE*. 2010;5(7):e11790.
30. Xue RD, Ali A, Barnard DR. Host species diversity and post-blood feeding carbohydrate availability enhance survival of females and fecundity in *Aedes albopictus* (Diptera: Culicidae). *Experimental parasitology*. 2008;119(2):225–228.
31. Xue RD, Barnard DR, Ali A. Influence of Multiple Blood Meals on Gonotrophic Dissociation and Fecundity in *Aedes albopictus*. *Journal of the American Mosquito Control Association*. 2009;25(4):504–507.
32. Xue RD, Barnard DR, Ali A. Laboratory and field evaluation of insect repellents as oviposition deterrents against the mosquito *Aedes albopictus*. *Medical and Veterinary Entomology*. 2001;15(2):126–131.
33. Aida HN, Hassan AA, Nurita AT, Salmah MRC, Norasmah B. Population analysis of *Aedes albopictus* (Skuse) (Diptera: Culicidae) under uncontrolled laboratory conditions. *Tropical biomedicine*. 2008;25(2):117–125.
34. Armbruster P, Hutchinson RA. Pupal Mass and Wing Length as Indicators of Fecundity in *Aedes albopictus* and *Aedes geniculatus* (Diptera: Culicidae). *Journal of Medical Entomology*. 2002;39(4):699–704.
35. Carrieri M, Bacchi M, Bellini R, Maini S. On the Competition Occurring Between *Aedes albopictus* and *Culex pipiens* (Diptera: Culicidae) in Italy. *Environmental Entomology*. 2003;32(6):1313–1321.
36. Muturi EJ, Costanzo K, Kesavaraaju B, Alto BW. Can Pesticides and Larval Competition Alter Susceptibility of *Aedes* Mosquitoes (Diptera: Culicidae) to Arbovirus Infection? *Journal of Medical Entomology*. 2011;48(2):429–436.
37. Hashim NA, Ahmad AH, Rawi CSM, Tahir NA, Basari N. Life tables study of immature *Aedes albopictus* (Skuse)(Diptera: Culicidae) during the wet and dry seasons in Penang, Malaysia. *The Southeast Asian Journal of Tropical Medicine and Public Health*. 2008;.
38. Lounibos LP, Suárez S, Menéndez Z, Nishimura N, Escher RL, O Connell SM, et al. Does temperature affect the outcome of larval competition between *Aedes aegypti* and *Aedes albopictus*? *Journal of Vector Ecology*. 2002;27:86–95.
39. Braks MAH, Honório NA, Lounibos LP, Lourenço-de Oliveira R, Juliano SA. Interspecific Competition Between Two Invasive Species of Container Mosquitoes, *Aedes aegypti* and *Aedes albopictus* (Diptera: Culicidae), in Brazil. *Annals of the Entomological Society of America*. 2004;97(1):130–139.



40. Gavotte L, Mercer DR, Vandyke R, Mains JW, Dobson SL. Wolbachia infection and resource competition effects on immature *Aedes albopictus* (Diptera: Culicidae). *Journal of medical entomology*. 2009;46(3):451.
41. Tseng S, Wu I. An ecological study of mosquitoes in Wuhan area. *Bulletin of Entomological Research*. 1951;42(03):527–533.
42. Liu T. Observations on the physiological age of *Culex pipiens pallens* Coquillett and *Aedes albopictus* Skuse. *Acta Entomologica Sinica*. 1965;14:179–185.
43. Galliard H. Findings on the biology of Culicidae in Hanoi (Tonkin, North Vietnam). I. Comparative larval development of various strains of *Aedes albopictus*, *Aedes aegypti*, *Culex fatigans* & *Armigeres obturans*. *Ann Parasitol Hum Comp*. 1958;33:131–144.
44. Halcrow JG. Notes on a laboratory colony of *Aedes* (*Stegomyia*) *albopictus* (Skuse) and its distribution in Mauritius. *Proceedings of the Royal Entomological Society of London*. 1955;30:40–42.
45. Hien DS. Biology of *Aedes aegypti* (L. 1762) and *Aedes albopictus* (Skuse, 1895) (Diptera, Culicidae). III. Effect of certain environmental conditions on the development of larvae and pupae. *Acta Parasitol Pol*. 1975;23:553–568.
