# Supplementary material for: Large-Scale Modelling of the Environmentally-Driven Population Dynamics of Temperate Aedes albopictus (Skuse)
Source: PubMed Central journal article supplement (PMC4752251; doi:10.1371/journal.pone.0149282), 2016-02-12
Supplement: pone.0149282.s006.pdf [file pone.0149282.s006.pdf]

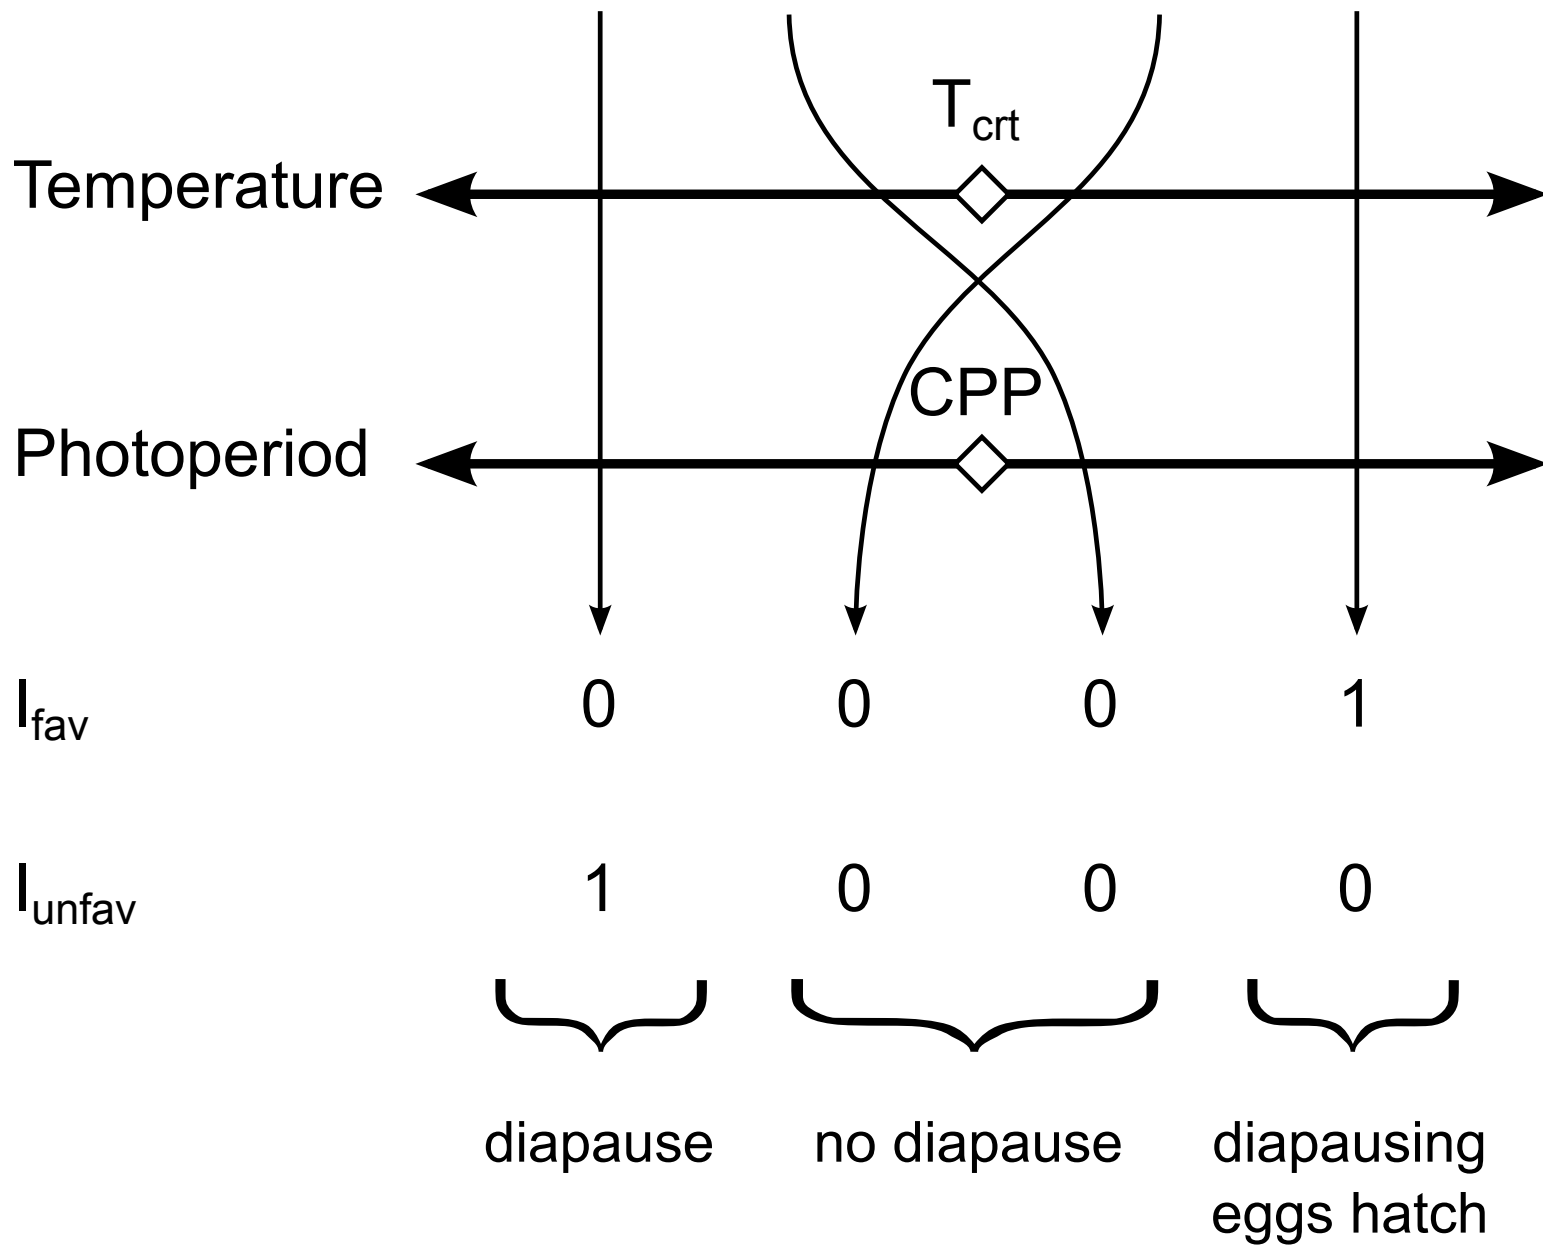

Figure S.2. Decision making for the diapausing behaviour.
