# Supplementary material for: Large-Scale Modelling of the Environmentally-Driven Population Dynamics of Temperate Aedes albopictus (Skuse)
Source: PubMed Central journal article supplement (PMC4752251; doi:10.1371/journal.pone.0149282), 2016-02-12
Supplement: pone.0149282.s007.pdf [file pone.0149282.s007.pdf]

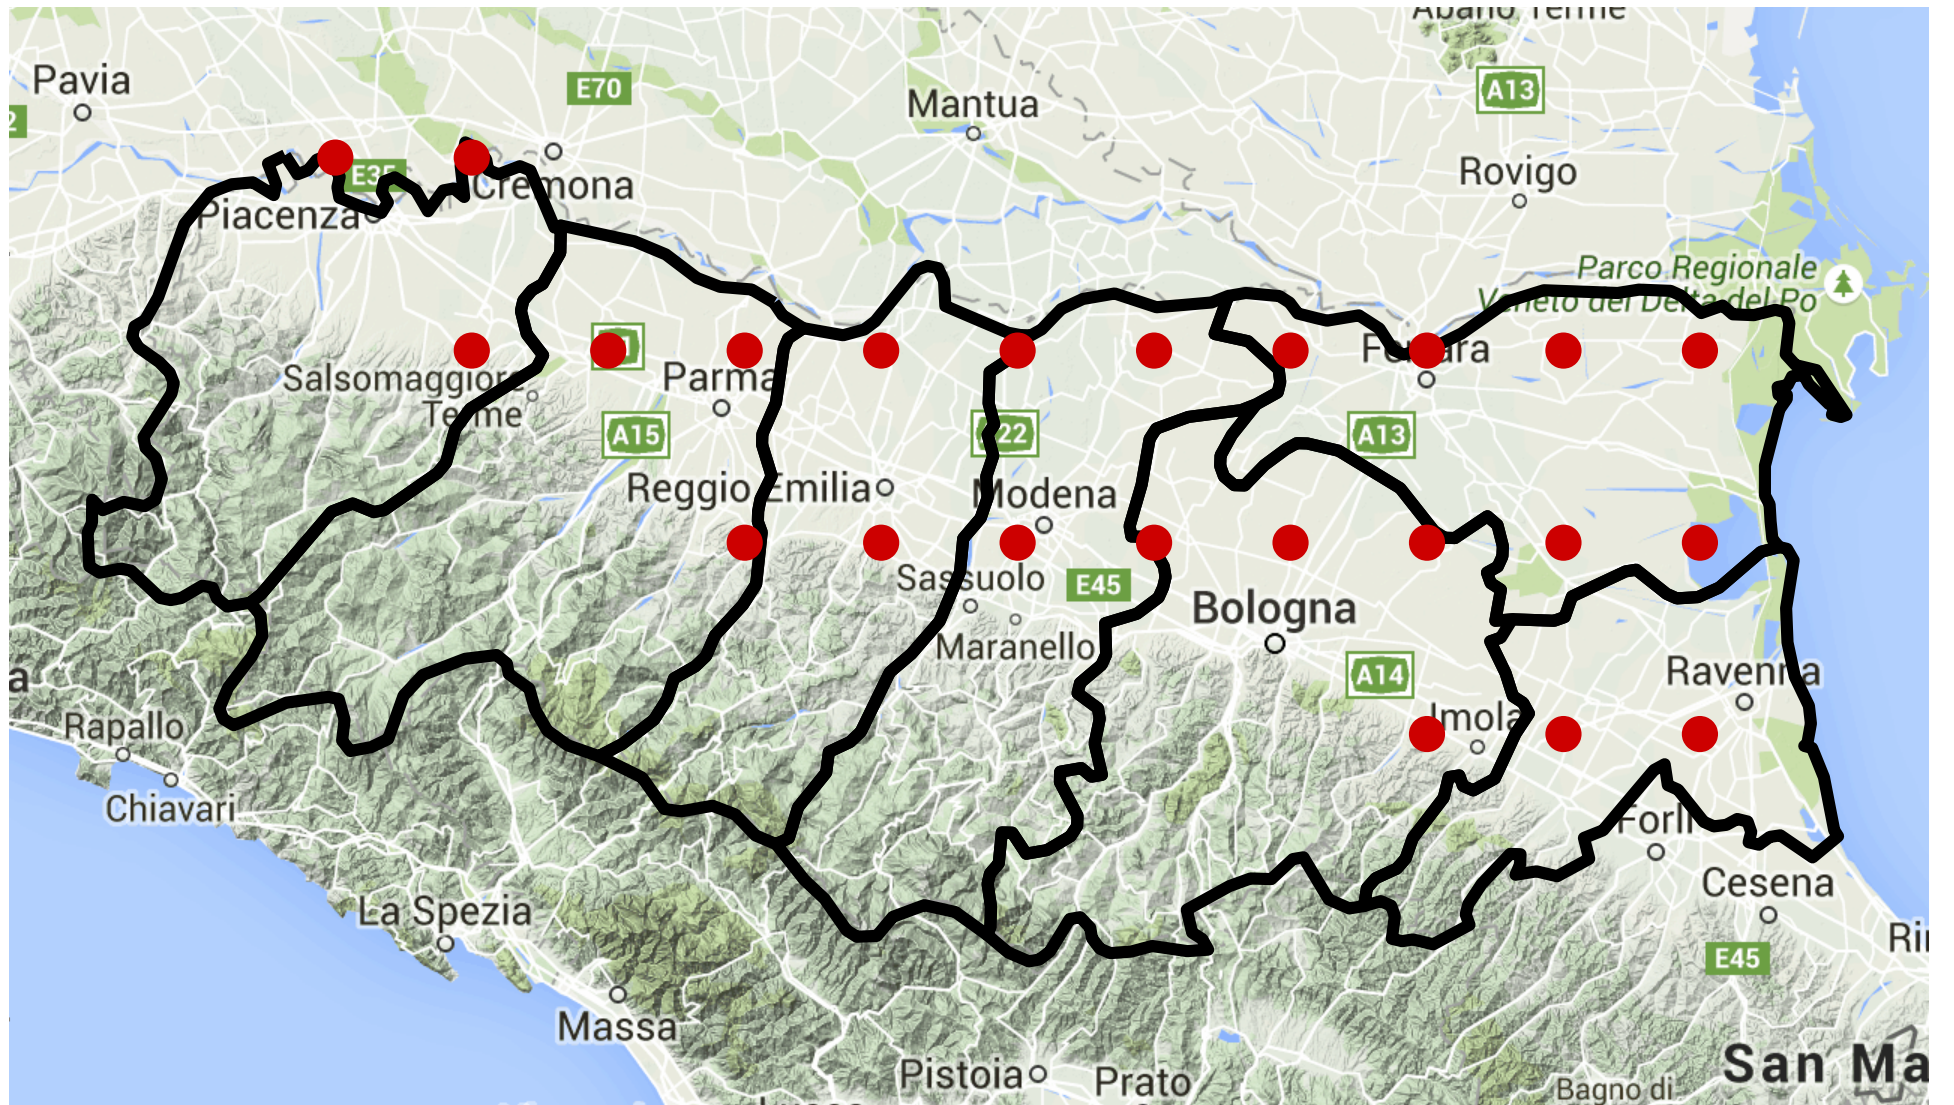

Figure S.3. Grid points of the higher-resolution datasets used for parameter inference.
