# Supplementary material for: Large-Scale Modelling of the Environmentally-Driven Population Dynamics of Temperate Aedes albopictus (Skuse)
Source: PubMed Central journal article supplement (PMC4752251; doi:10.1371/journal.pone.0149282), 2016-02-12
Supplement: pone.0149282.s008.pdf [file pone.0149282.s008.pdf]

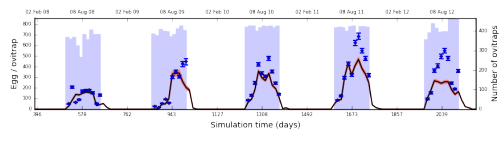

Bologna ( $\Theta_1$ )

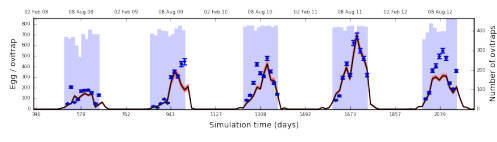

Bologna ( $\Theta_2$ )

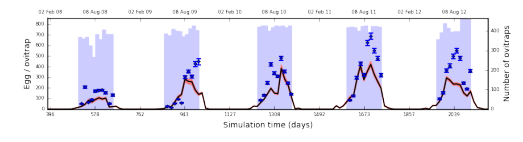

Bologna ( $\Theta_3$ )

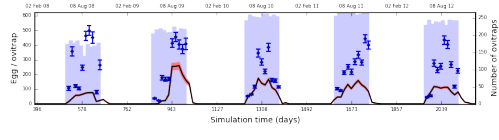

Ferrara ( $\Theta_1$ )

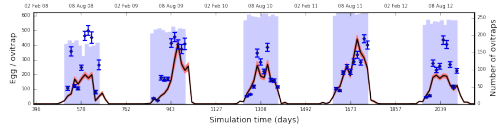

Ferrara ( $\Theta_2$ )

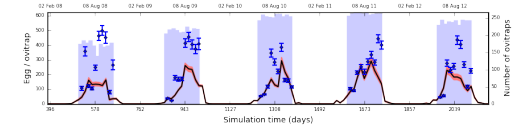

Ferrara ( $\Theta_3$ )

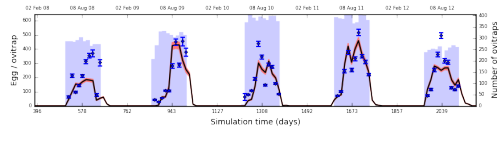

Modena ( $\Theta_1$ )

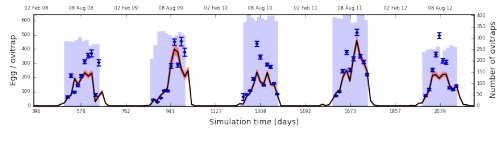

Modena ( $\Theta_2$ )

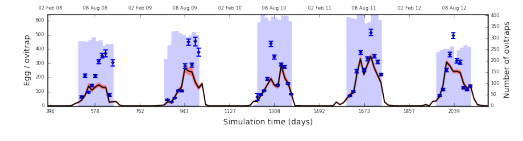

Modena ( $\Theta_3$ )

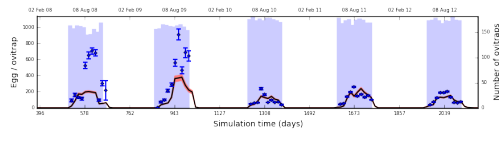

Piacenza ( $\Theta_1$ )

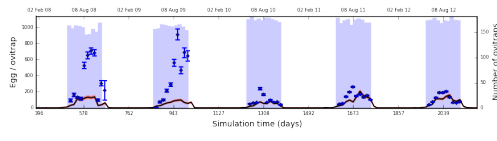

Piacenza ( $\Theta_2$ )

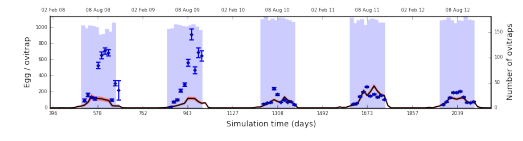

Piacenza ( $\Theta_3$ )

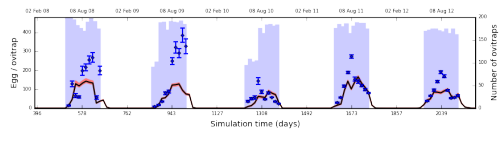

Parma ( $\Theta_1$ )

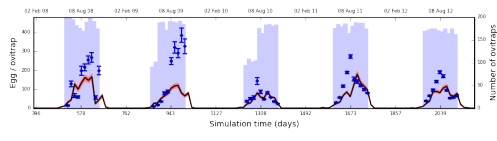

Parma ( $\Theta_2$ )

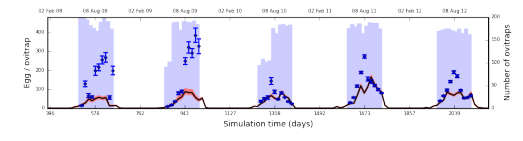

Parma ( $\Theta_3$ )

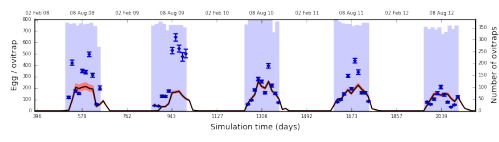

Ravenna ( $\Theta_1$ )

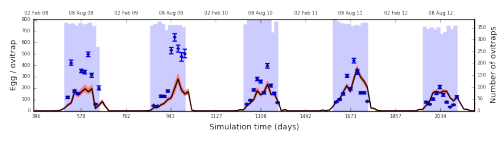

Ravenna ( $\Theta_2$ )

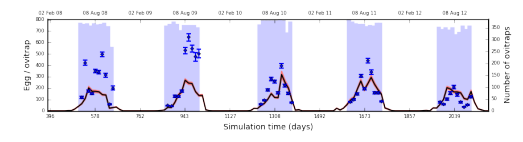

Ravenna ( $\Theta_3$ )

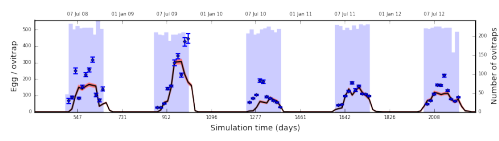

Reggio Emilia ( $\Theta_1$ )

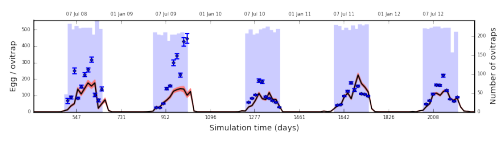

Reggio Emilia ( $\Theta_2$ )

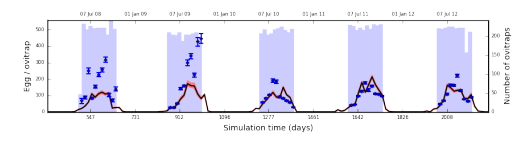

Reggio Emilia ( $\Theta_3$ )

Figure S.4. Evaluating model performance over Emilia-Romagna with  $\Theta_1$ ,  $\Theta_2$  and  $\Theta_3$ .
