# Supplementary material for: Large-Scale Modelling of the Environmentally-Driven Population Dynamics of Temperate Aedes albopictus (Skuse)
Source: PubMed Central journal article supplement (PMC4752251; doi:10.1371/journal.pone.0149282), 2016-02-12
Supplement: pone.0149282.s010.pdf [file pone.0149282.s010.pdf]

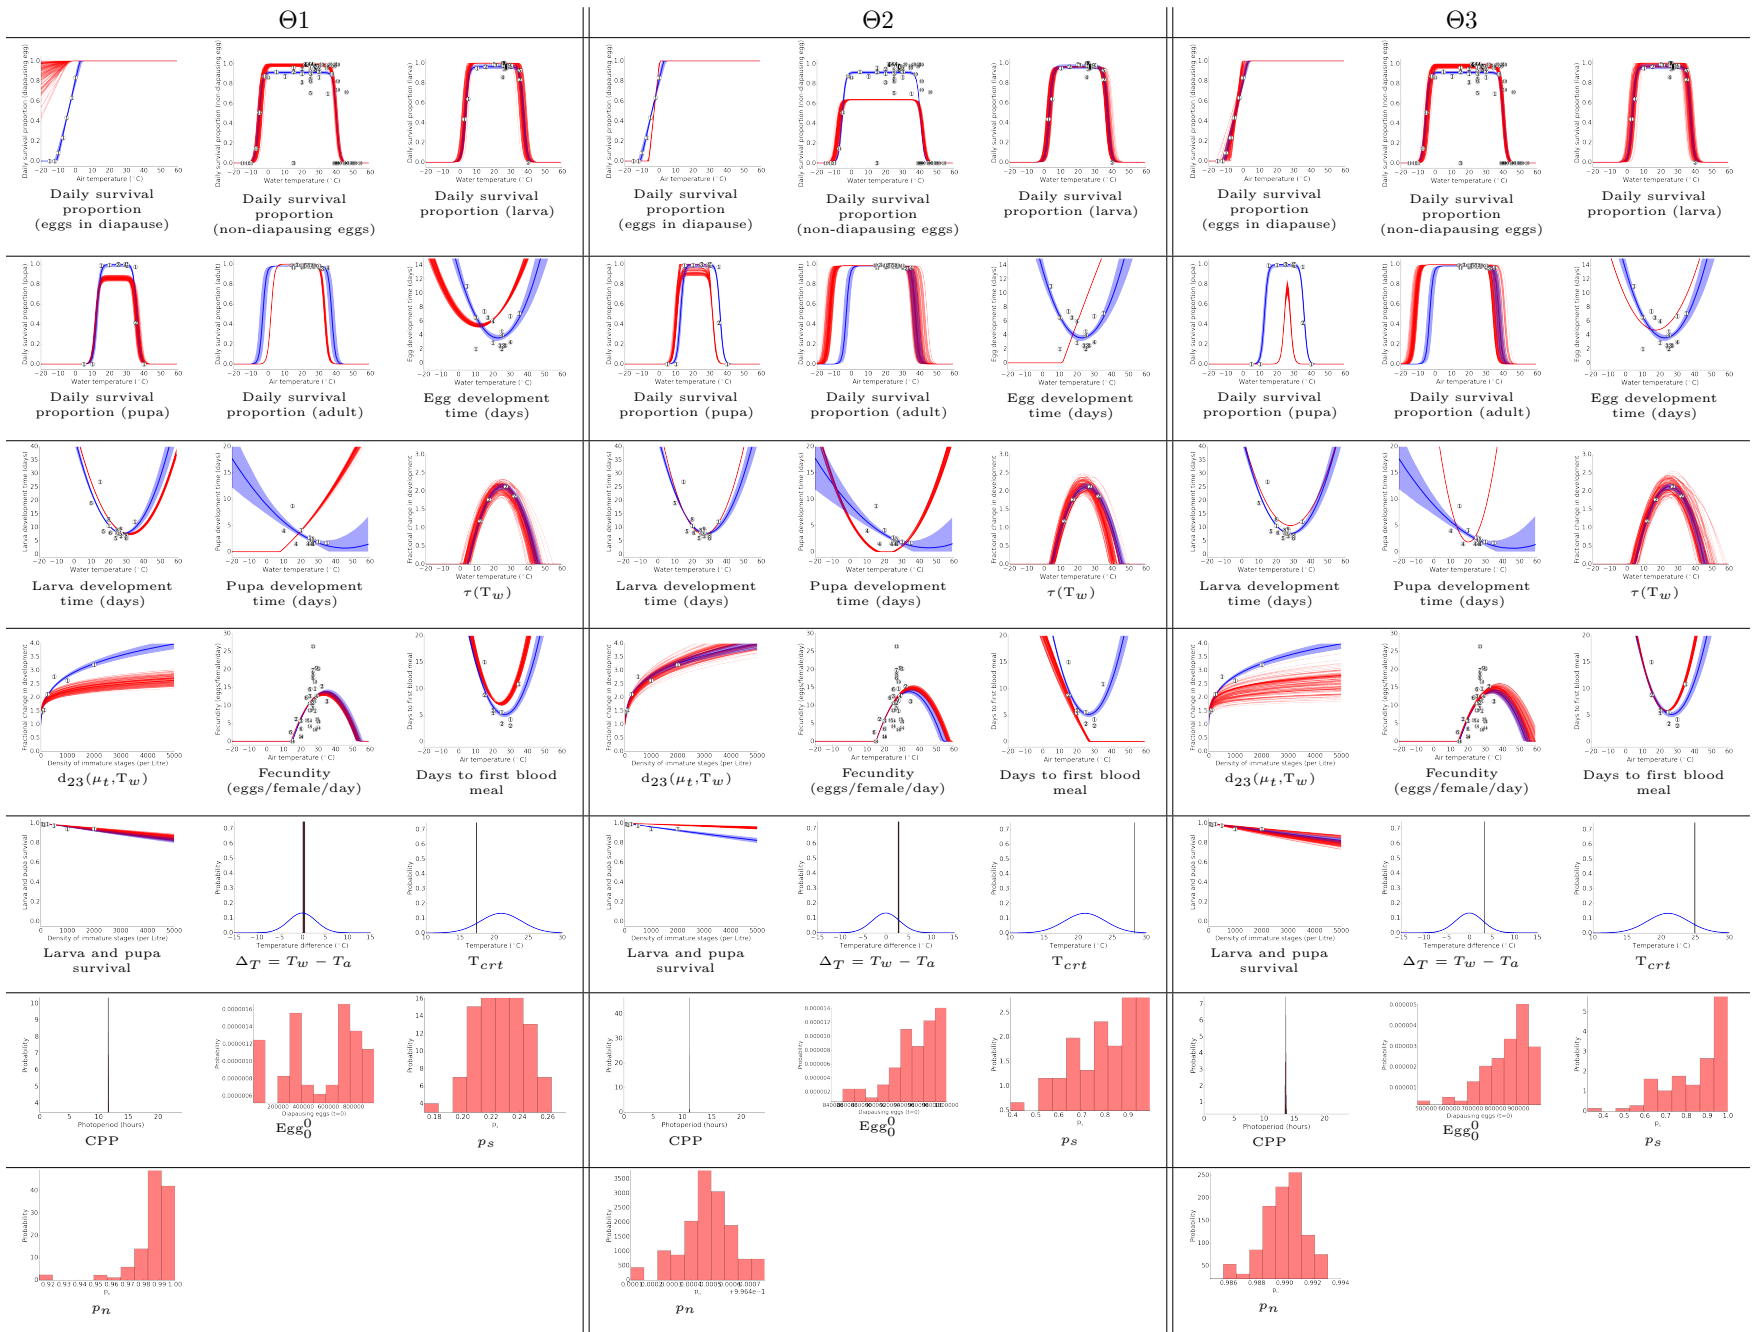

Figure S.6. Comparison of prior and posterior distributions  $\Theta_1$ ,  $\Theta_2$  and  $\Theta_3$ .
