# Supplementary material for: Large-Scale Modelling of the Environmentally-Driven Population Dynamics of Temperate Aedes albopictus (Skuse)
Source: PubMed Central journal article supplement (PMC4752251; doi:10.1371/journal.pone.0149282), 2016-02-12
Supplement: pone.0149282.s012.pdf [file pone.0149282.s012.pdf]

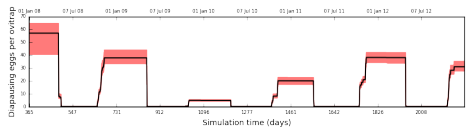

Bologna ( $\Theta 1$ )

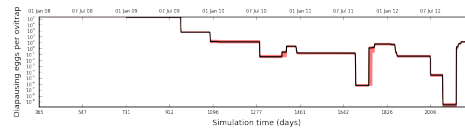

Bologna ( $\Theta 2$ )

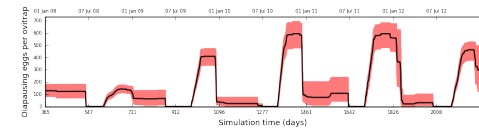

Bologna ( $\Theta 3$ )

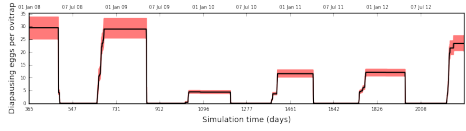

Ferrara ( $\Theta 1$ )

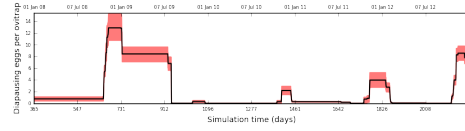

Ferrara ( $\Theta 2$ )

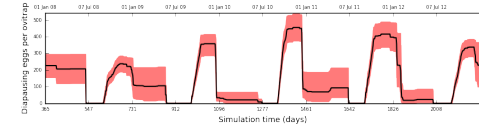

Ferrara ( $\Theta 3$ )

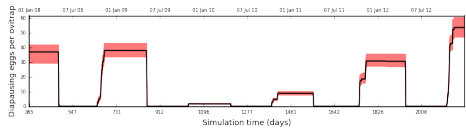

Modena ( $\Theta 1$ )

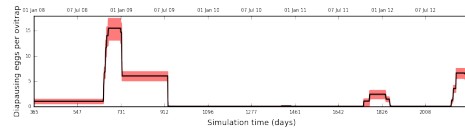

Modena ( $\Theta 2$ )

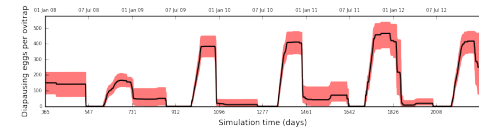

Modena ( $\Theta 3$ )

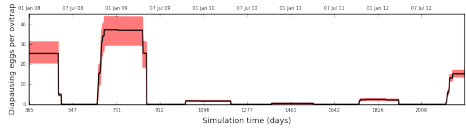

Piacenza ( $\Theta 1$ )

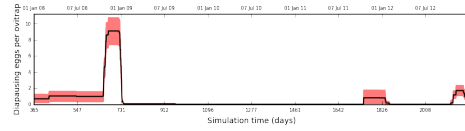

Piacenza ( $\Theta 2$ )

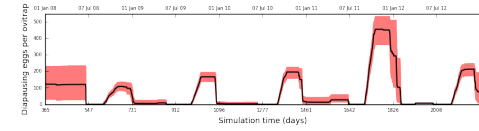

Piacenza ( $\Theta 3$ )

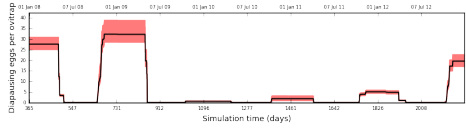

Parma ( $\Theta 1$ )

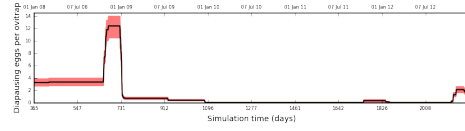

Parma ( $\Theta 2$ )

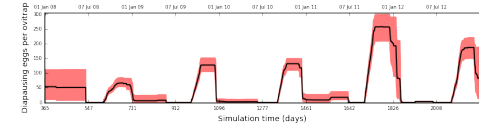

Parma ( $\Theta 3$ )

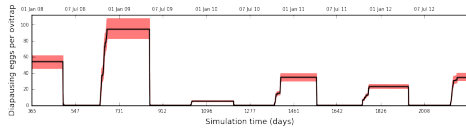

Ravenna ( $\Theta 1$ )

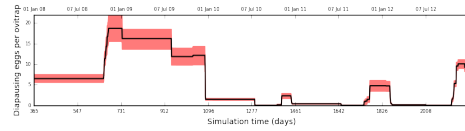

Ravenna ( $\Theta 2$ )

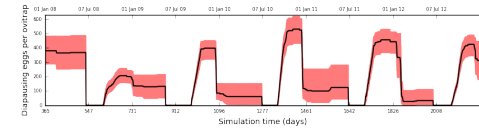

Ravenna ( $\Theta 3$ )

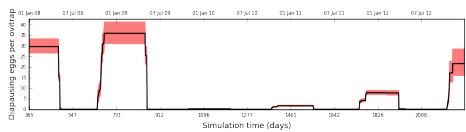

Reggio Emilia ( $\Theta 1$ )

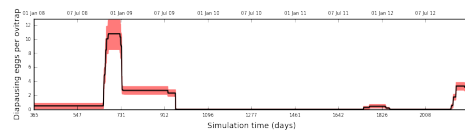

Reggio Emilia ( $\Theta 2$ )

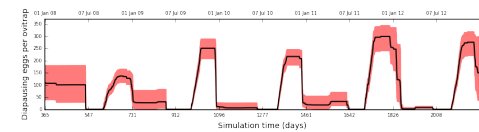

Reggio Emilia ( $\Theta 3$ )

Figure S.8. Simulated number of diapausing eggs per ovitrap.
