# Supplementary material for: Large-Scale Modelling of the Environmentally-Driven Population Dynamics of Temperate Aedes albopictus (Skuse)
Source: PubMed Central journal article supplement (PMC4752251; doi:10.1371/journal.pone.0149282), 2016-02-12
Supplement: pone.0149282.s014.pdf [file pone.0149282.s014.pdf]

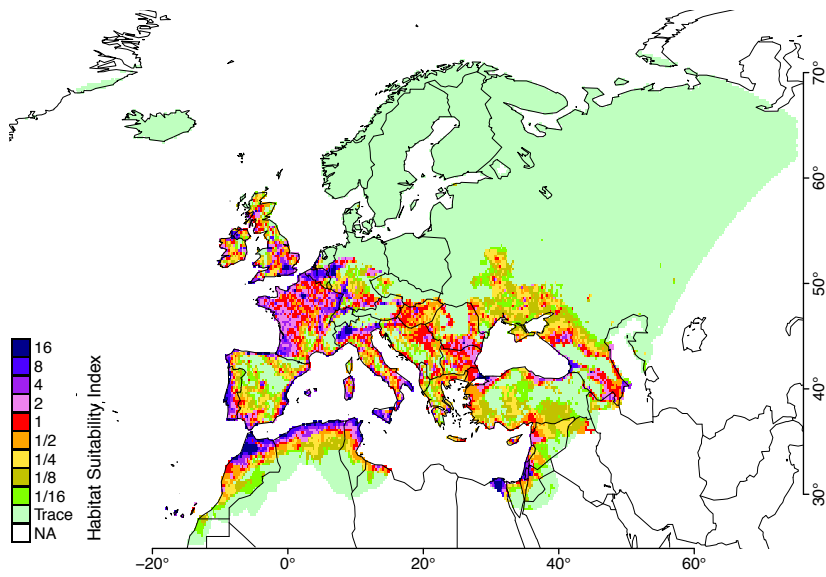

$\Theta 1$

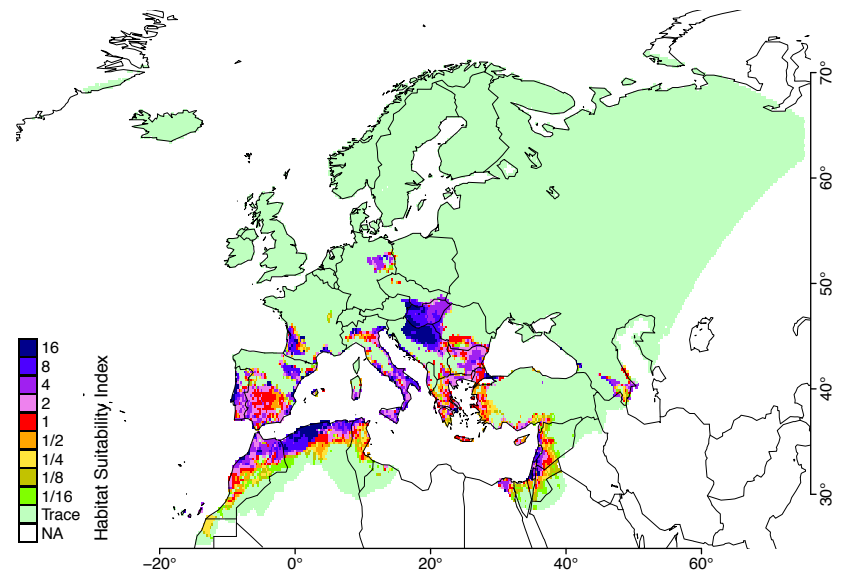

$\Theta 2$

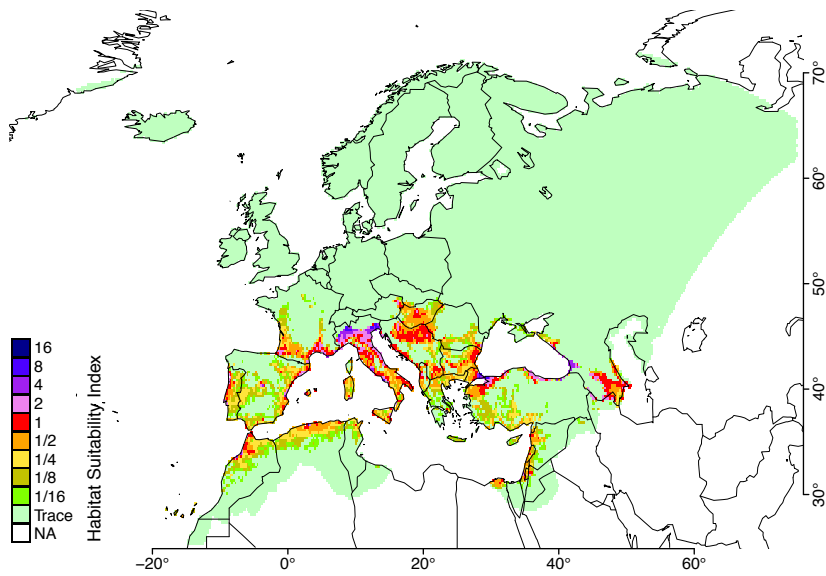

$\Theta 3$

Figure S.10. Habitat suitability indices (HSI) for Europe with  $\Theta 1$ ,  $\Theta 2$  and  $\Theta 3$ .
